# Supplementary material for: Modulation of embryo-forming capacity in culture through the expression of Brassica genes involved in the regulation of the shoot apical meristem
Source: PubMed Central journal article supplement — J Exp Bot. 2010 Aug 20;61(14):4069–85. doi: 10.1093/jxb/erq222 (PMC2935877; doi:10.1093/jxb/erq222), 2010-08-20
Supplement: supp_erq222_00048512-file001.pdf [file supp_erq222_00048512-file001.pdf]

**Supplement to**  
**Short flashes and continuous light have similar photoinhibitory efficiency in intact leaves**

Päivi Sarvikas, Marja Hakala, Sirin Dönmez and Esa Tyystjärvi

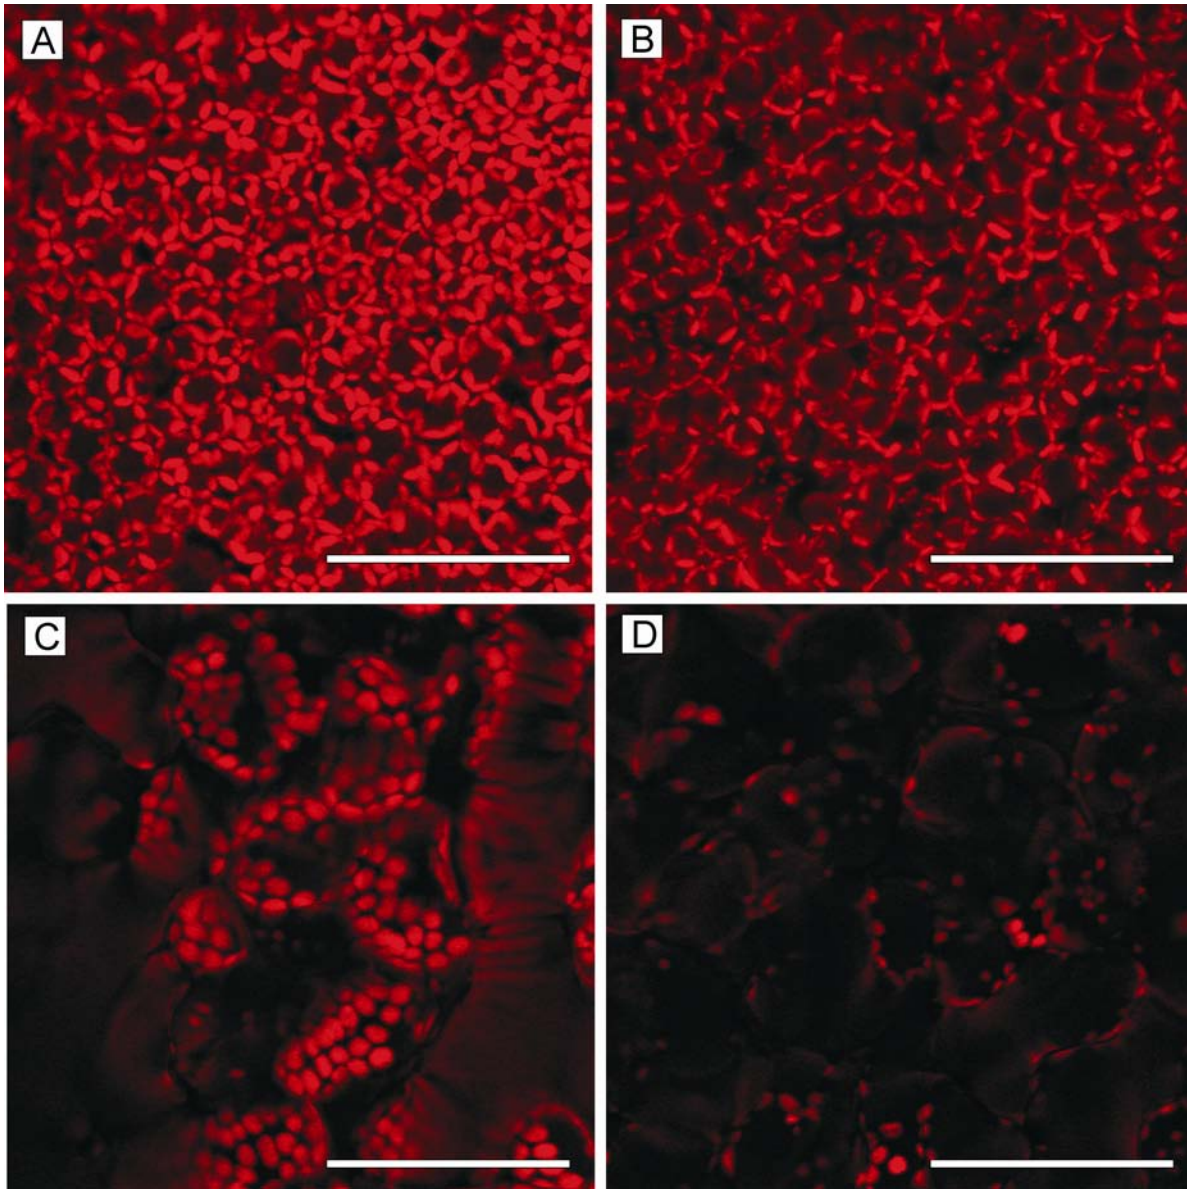

**Fig. S1.** Confocal images from the uppermost cell layer of a pumpkin (A, B) and Arabidopsis (C, D) leaf before (A, C) and after (B, D) 30-min illumination with continuous light, PPFD  $1350 \mu\text{mol m}^{-2}\text{s}^{-1}$ . Before the high-light treatment, the leaves were kept for 1 h at the PPFD of  $20 \mu\text{mol m}^{-2}\text{s}^{-1}$ . The scale bar indicates  $100 \mu\text{m}$ .

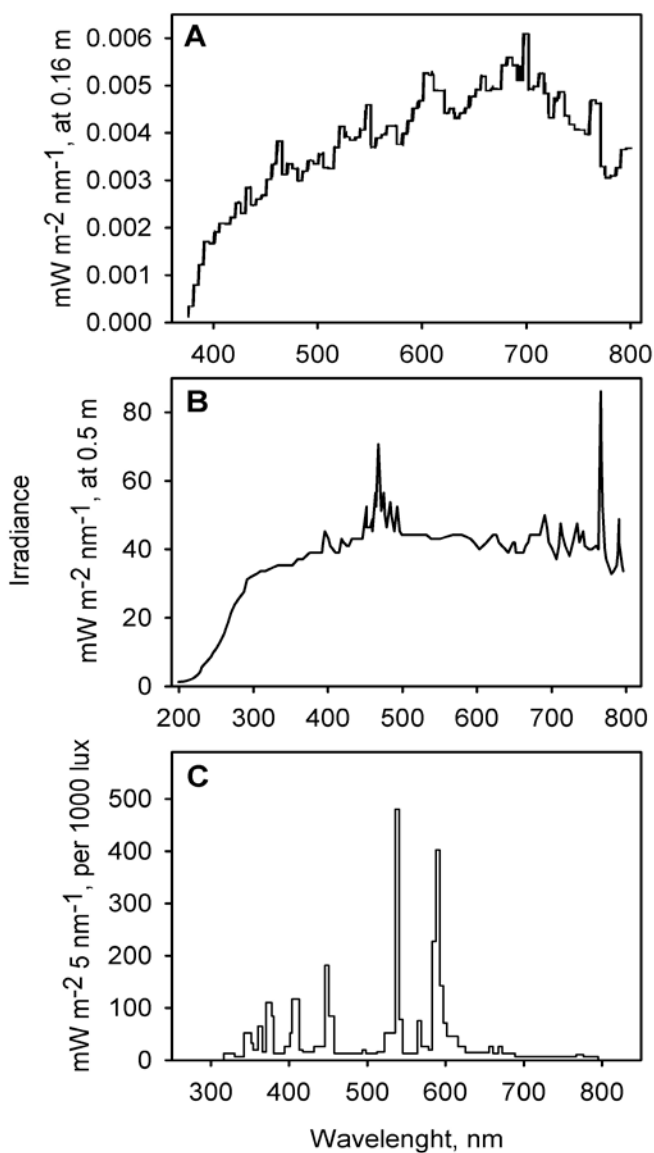

**Fig. S2.** The emission spectrum of the FX-200 Xenon flash lamp (EG&G), measured through a Schott GG400 filter (A), spectrum of the continuous-light Xenon lamp (Oriental Instruments) (B) and spectrum of the Philips HPI-T Plus lamp (C). The Xenon flash lamp was measured by Solar Simulator Finland Ltd and the data for the continuous-light lamps were provided by the manufacturers. A GG400 filter was routinely used to block the UV emission of the continuous-light Xenon lamp.

**Table S1.** Photochemical quenching, measured from pumpkin leaves during illumination with Xenon flashes. The leaf was illuminated from 1 cm distance with the flash lamp and fluorescence was simultaneously measured with the PAM-2000 fluorometer. After illumination of 1 min (flash rates 10-30 fps) or 5 min (1 fps) a saturating pulse (PPFD 4500  $\mu\text{mol m}^{-2} \text{s}^{-1}$ , 0.8 s) was fired, the flashing was switched off and  $F_0'$  was measured using a 2 s pulse of far-red light. The values show the mean and SD of three independent experiments.

| Flash energy, J | Flash rate, fps | qP        |
|-----------------|-----------------|-----------|
| 0.1             | 30              | 0.98±0.02 |
| 0.6             | 20              | 0.99±0.01 |
| 1.35            | 10              | 0.98±0.02 |
| 13.5            | 1               | 0.99±0.01 |

**Table S2.** Pearson correlation ( $r$ ) between  $k_{PI}$  and the energy of the flashes ( $E$ ), and between  $k_{PI}$  and the time interval between the flashes ( $Int$ ). The  $p$  value is the probability that the correlation is a coincidence. The correlations were calculated separately for  $k_{PI}$  values calculated either from oxygen evolution or from  $F_V/F_M$ . First, the correlation coefficients were calculated for all data, then for subsets of data in which either the flash energy was constant (1.3, 3.4 or 13.5 J), and for subsets in which the interval was constant (1, 9 or 90 s). In all cases, the  $k_{PI}$  values were calculated per flash.

| $k_{PI}$<br>calc.<br>from      |   | All<br>data      | All<br>data        | E=<br>1.3 J        | E=<br>3.4 J        | E=<br>13.5 J       | Int=<br>1 s      | Int=<br>9 s      | Int=<br>90 s     |
|--------------------------------|---|------------------|--------------------|--------------------|--------------------|--------------------|------------------|------------------|------------------|
|                                |   | $k_{PI}$ vs<br>E | $k_{PI}$ vs<br>Int | $k_{PI}$ vs<br>Int | $k_{PI}$ vs<br>Int | $k_{PI}$ vs<br>Int | $k_{PI}$ vs<br>E | $k_{PI}$ vs<br>E | $k_{PI}$ vs<br>E |
| O <sub>2</sub><br>evol.        | r | 0.822            | 0.173              | 0.254              | -0.122             | 0.494              | 0.823            | 0.891            | 0.864            |
|                                | p | <0.001           | 0.162              | 0.254              | 0.737              | 0.014              | <0.001           | <0.001           | <0.001           |
| F <sub>V</sub> /F <sub>M</sub> | r | 0.822            | -0.006             | 0.360              | -0.317             | -0.096             | 0.891            | 0.811            | 0.779            |
|                                | p | <0.001           | 0.961              | 0.091              | 0.444              | 0.664              | <0.001           | <0.001           | <0.001           |
